# Supplementary material
Source: MDPI journal article supplement (https://www.mdpi.com/2073-4344/12/9/1064)
Supplement: s1 [file s1]

# Exploring the effect of hierarchical porosity in BEA zeolite in Friedel-Crafts acylations of furan and benzofuran

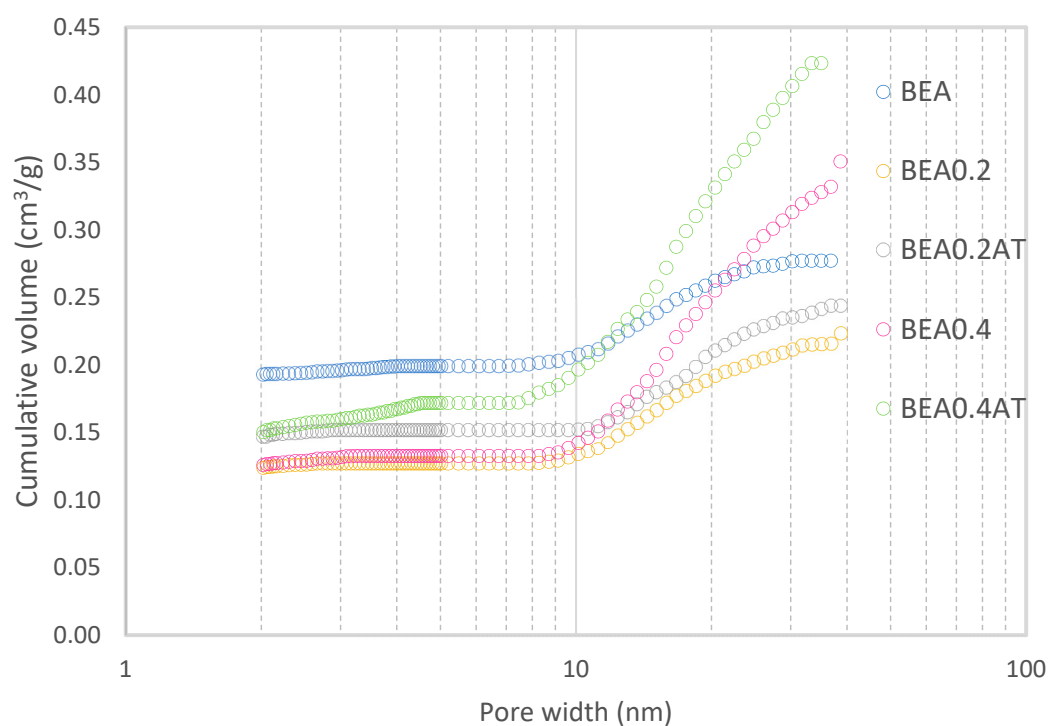

**Figure S1.** Mesopore size distribution for parent and treated samples.
